# Supplementary material for: BCL9 regulates CD226 and CD96 checkpoints in CD8+ T cells to improve PD-1 response in cancer
Source: PubMed Central journal article supplement (PMC8379253; doi:10.1038/s41392-021-00730-0), 2021-08-20

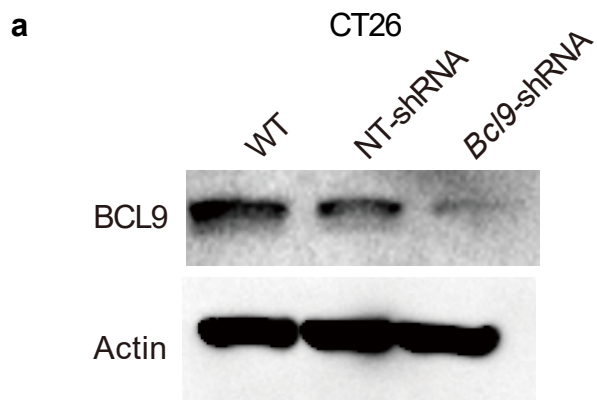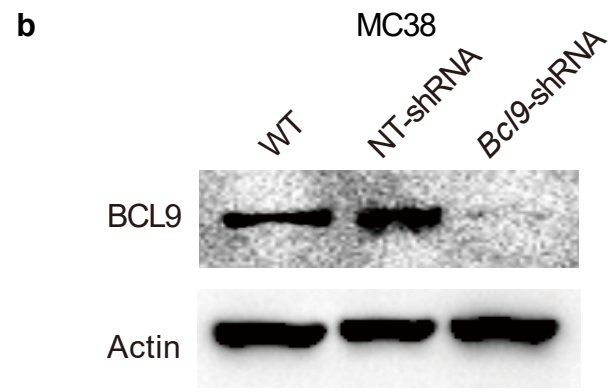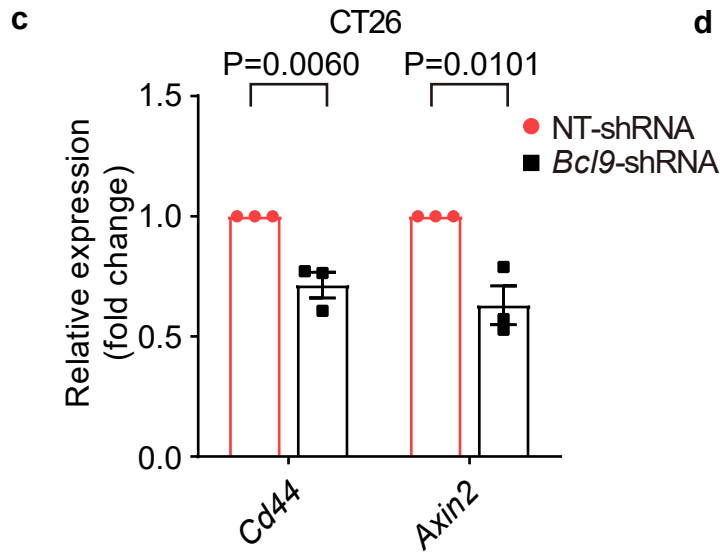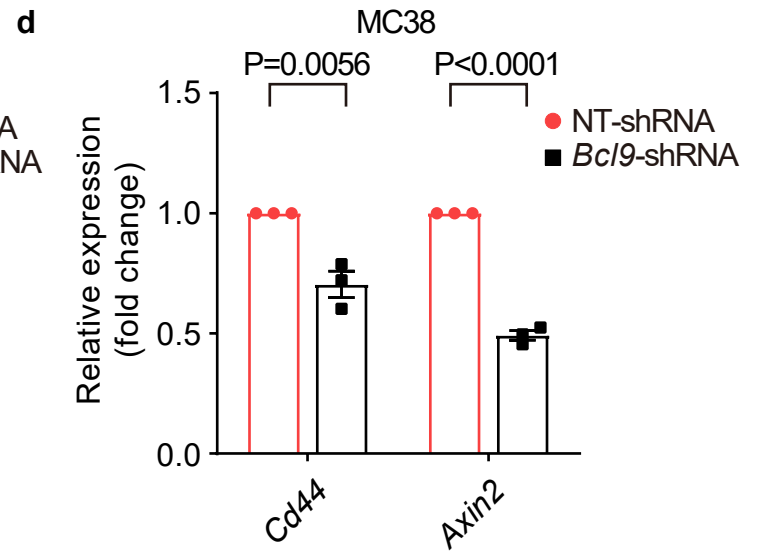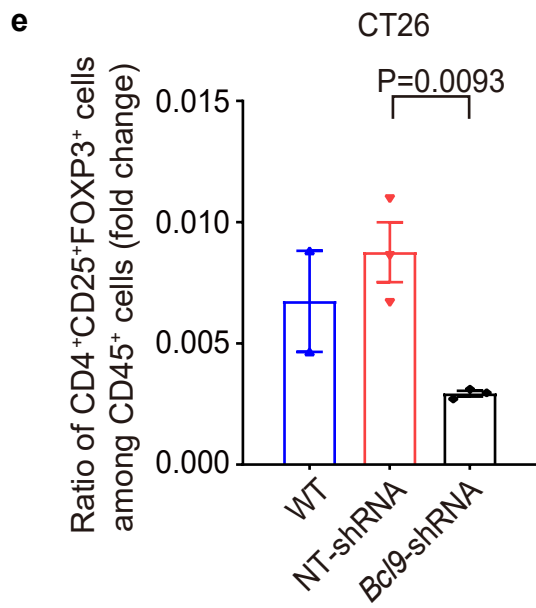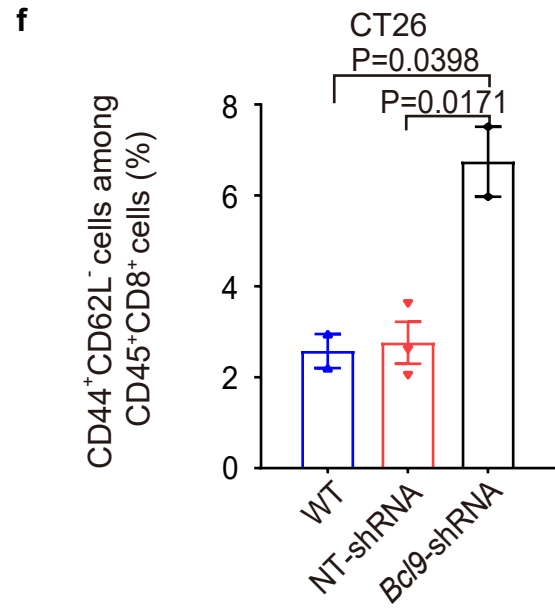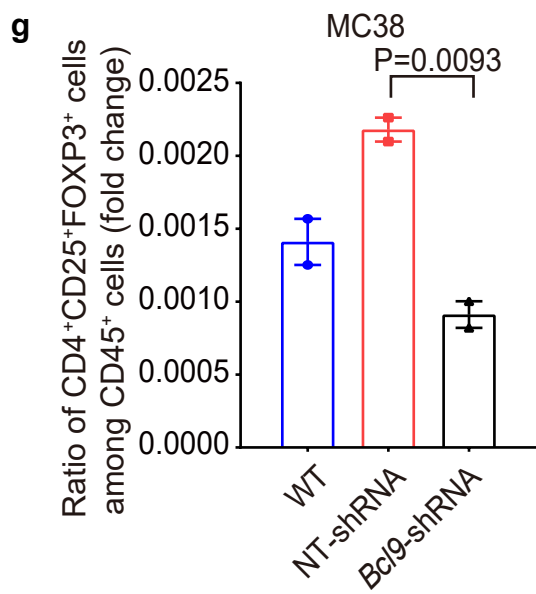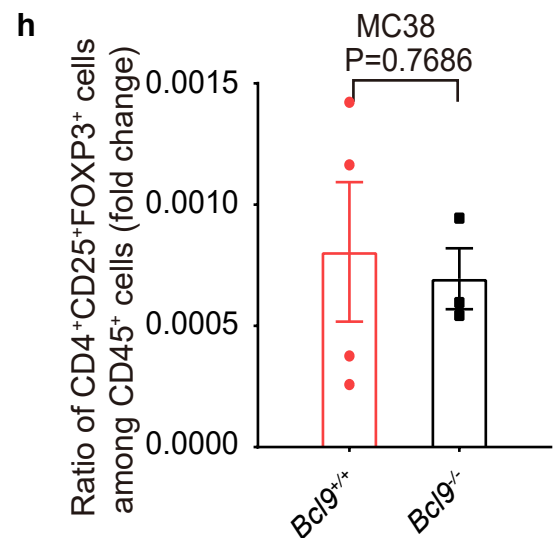

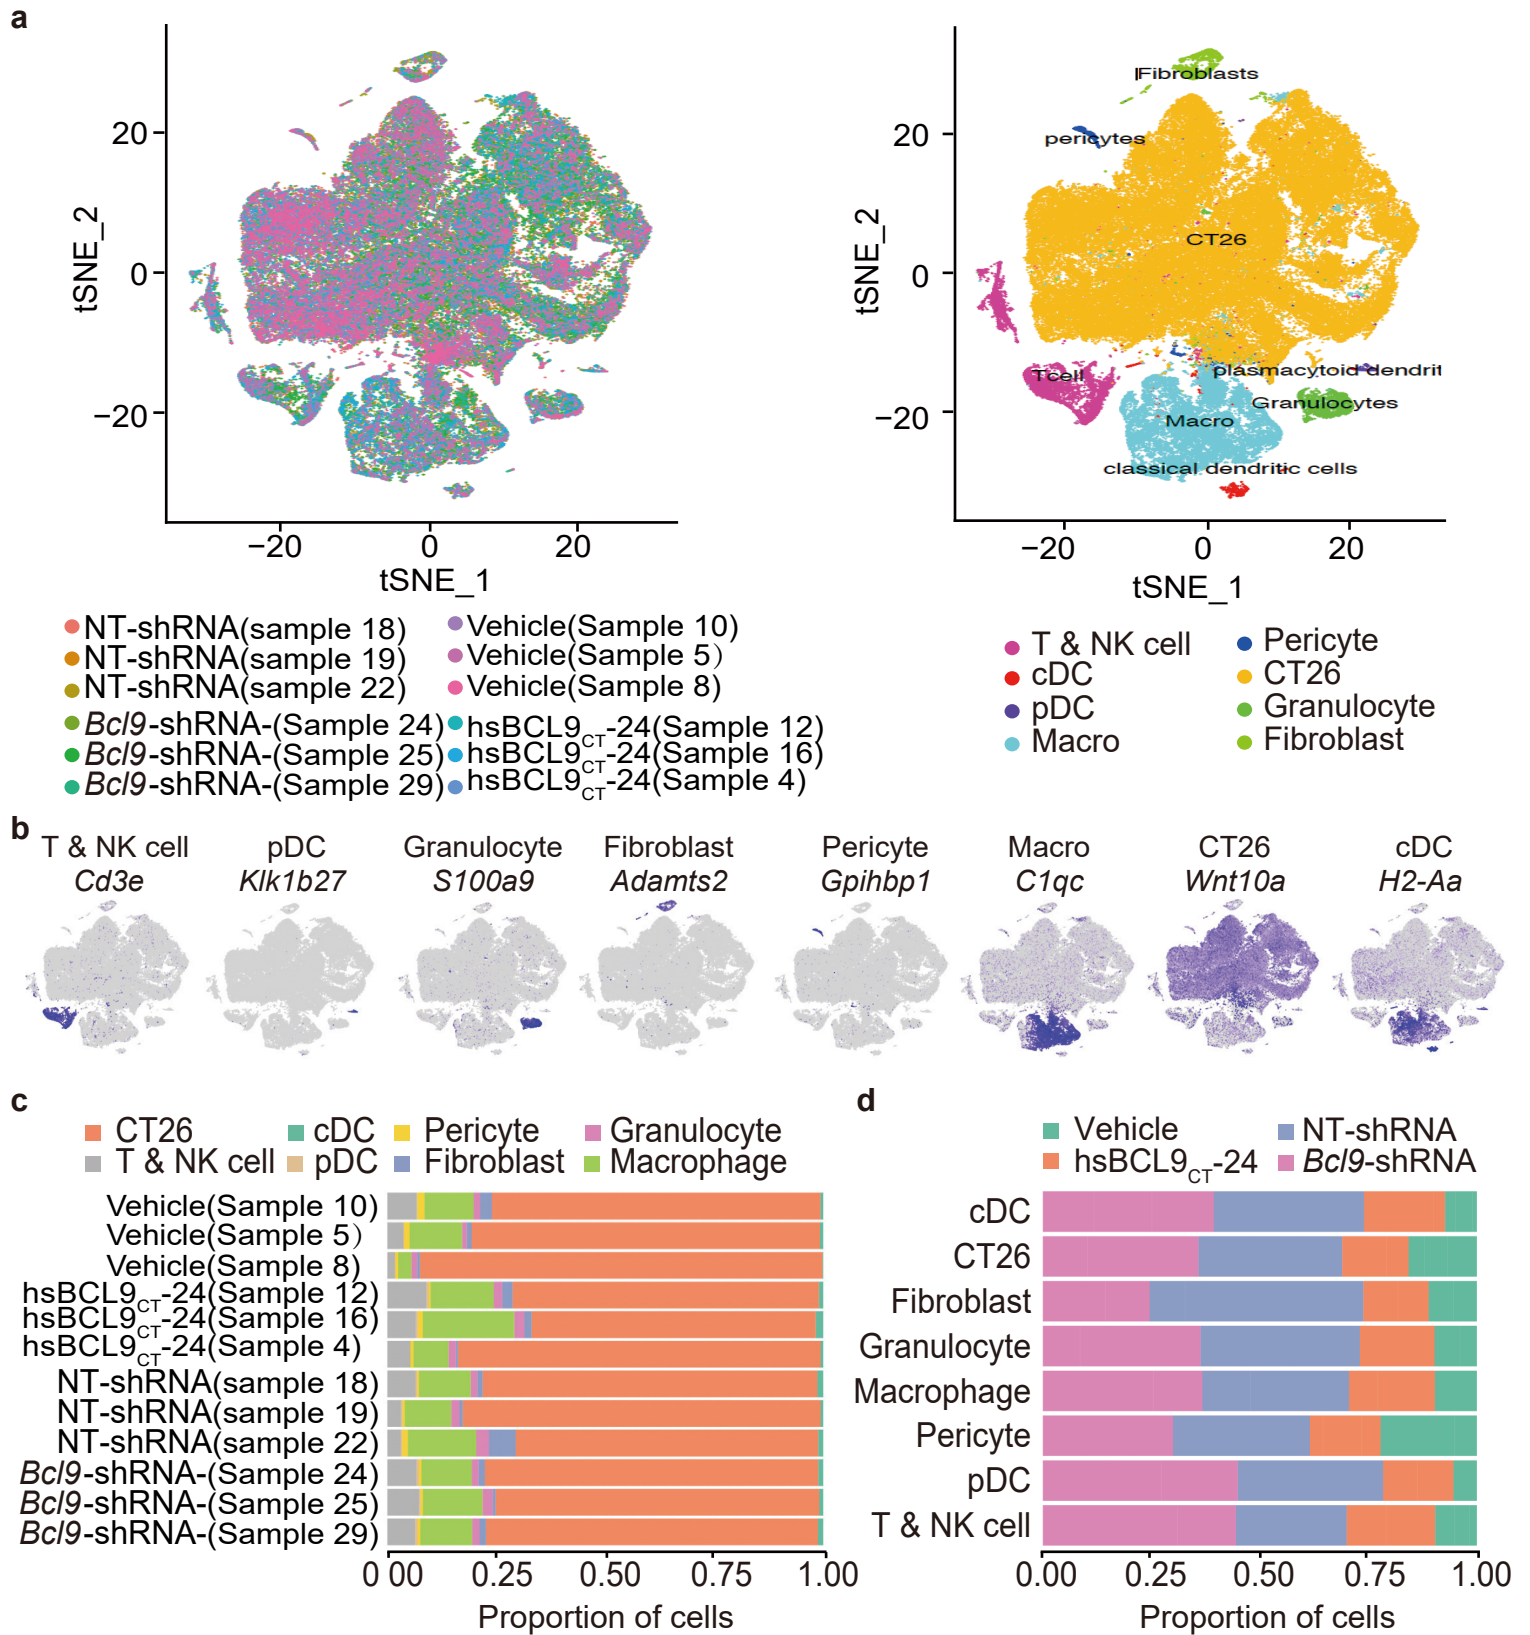

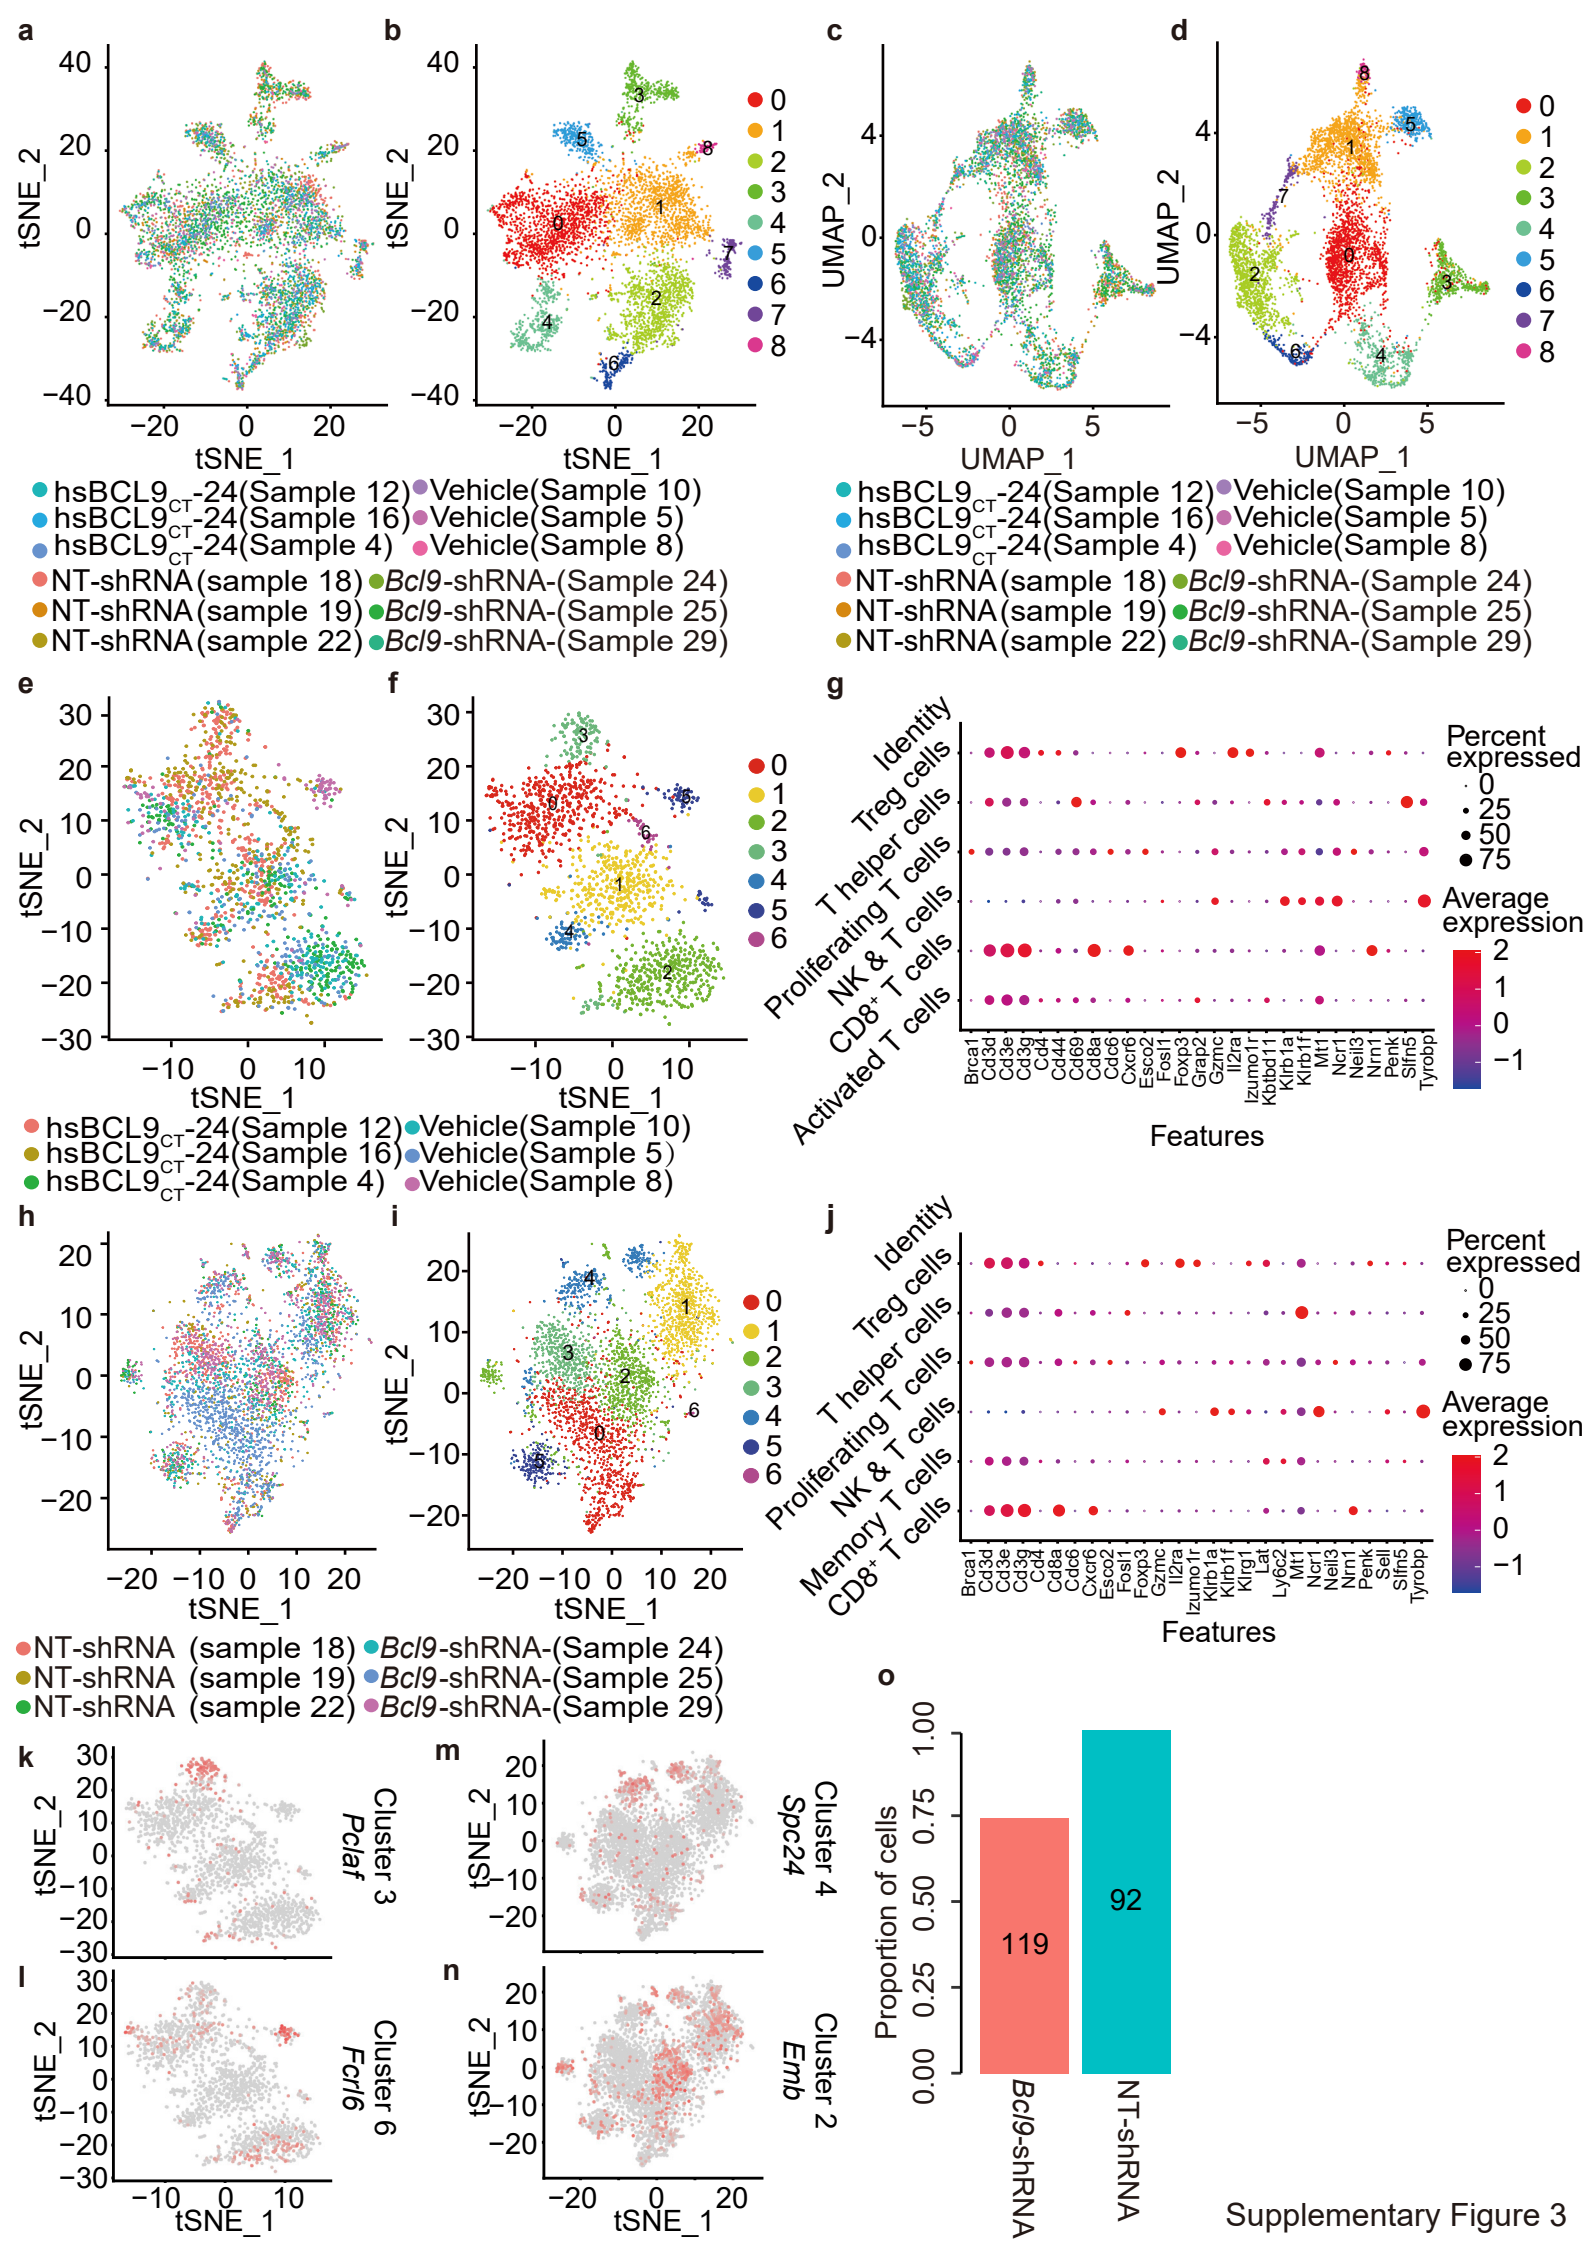

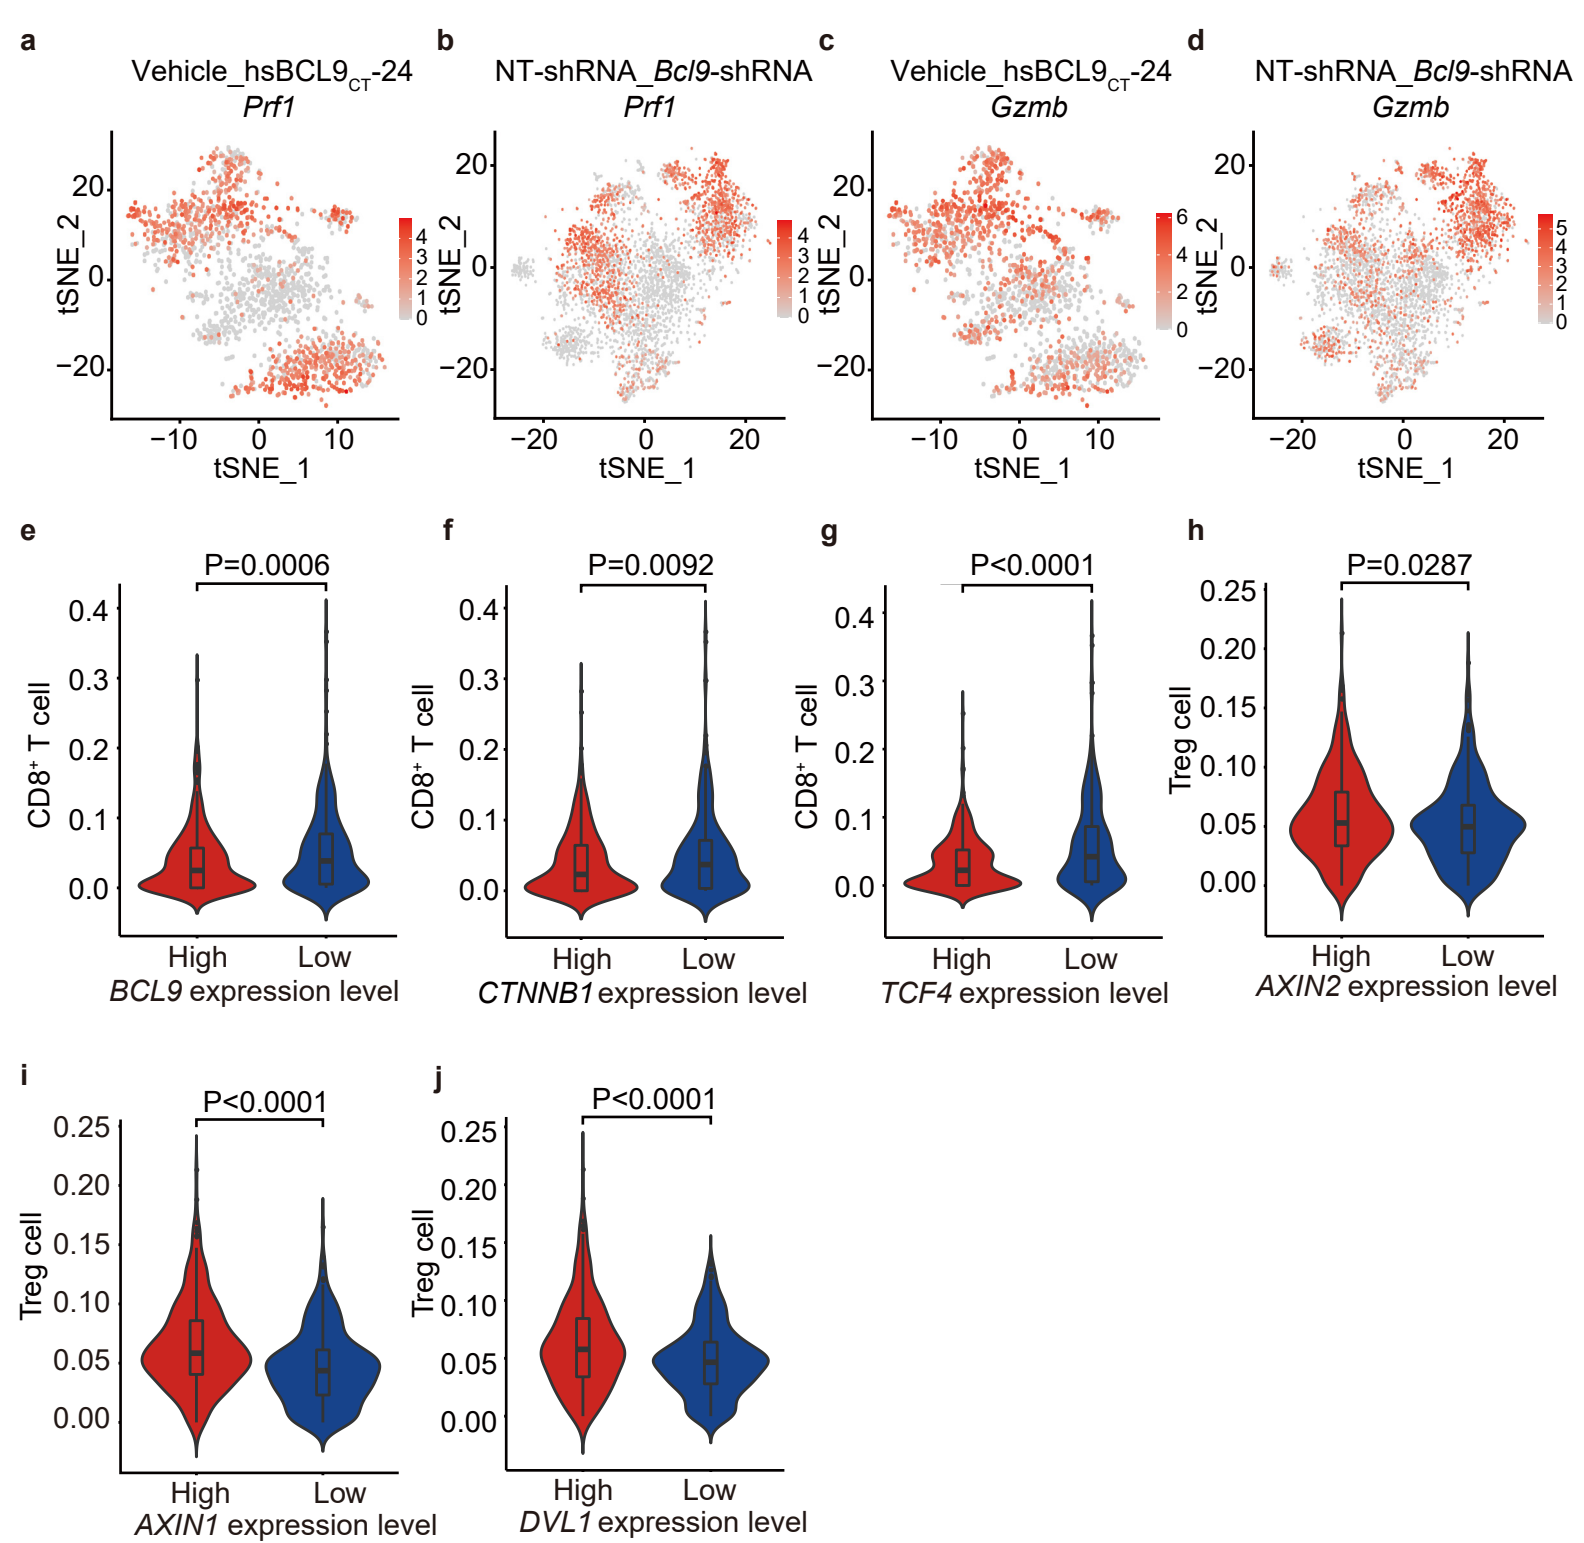

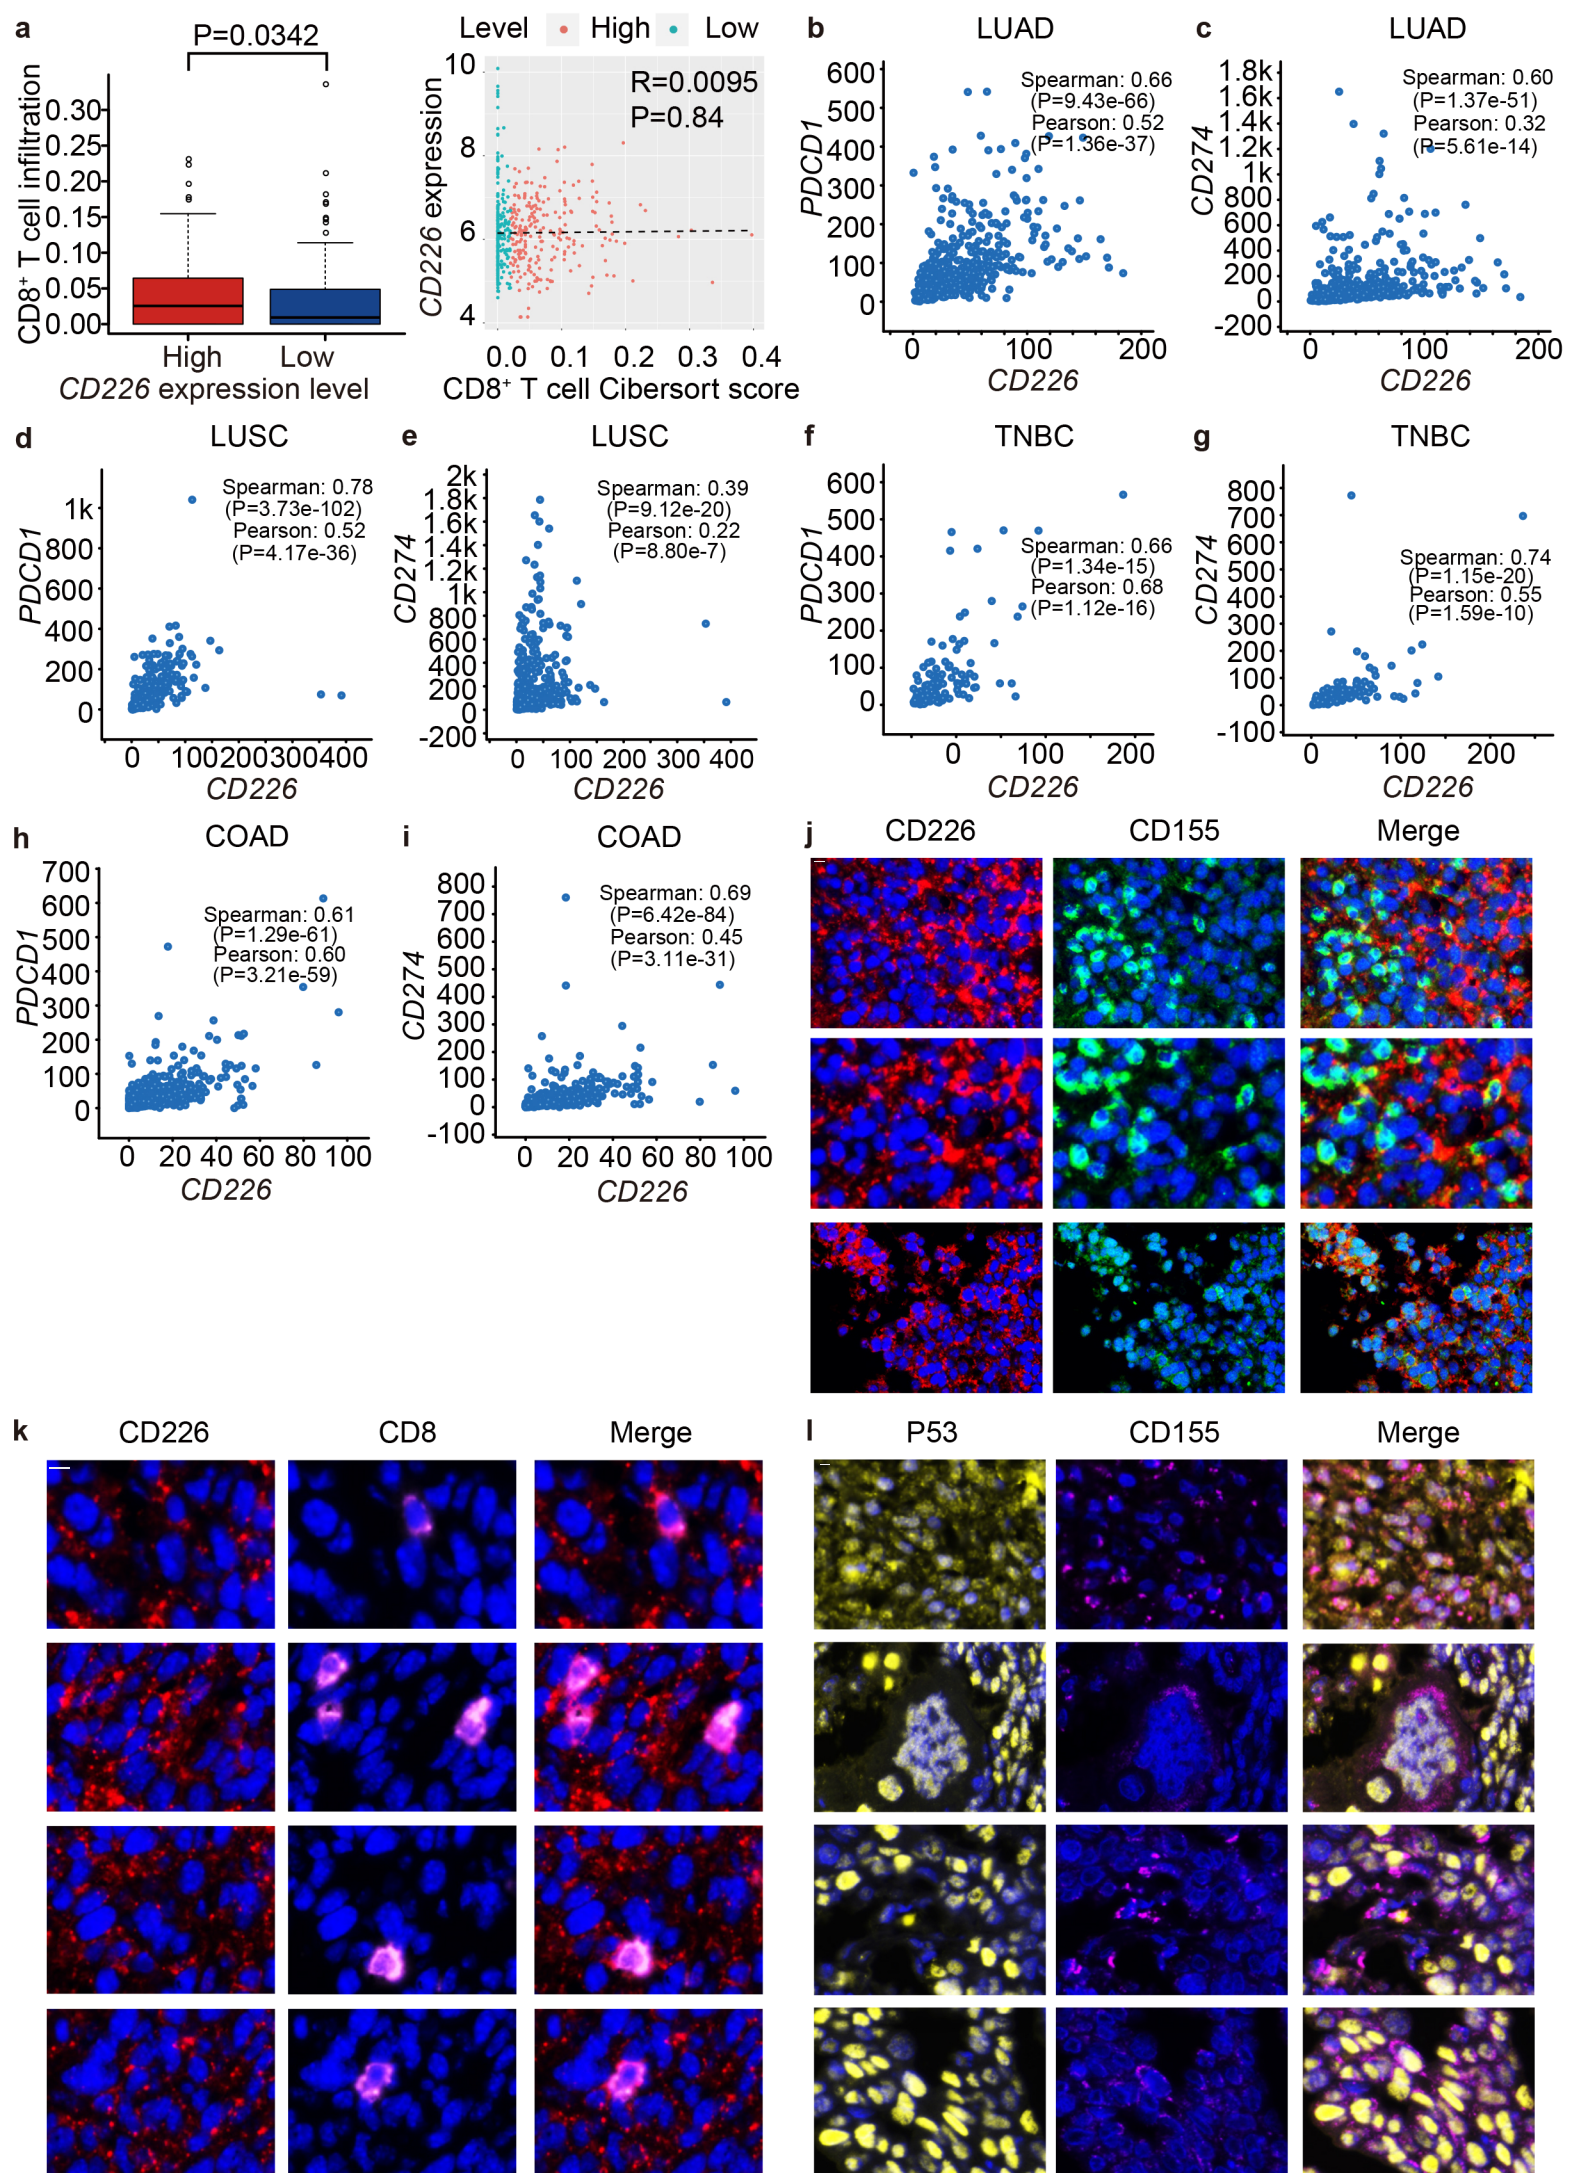

Supplementary Figure 5

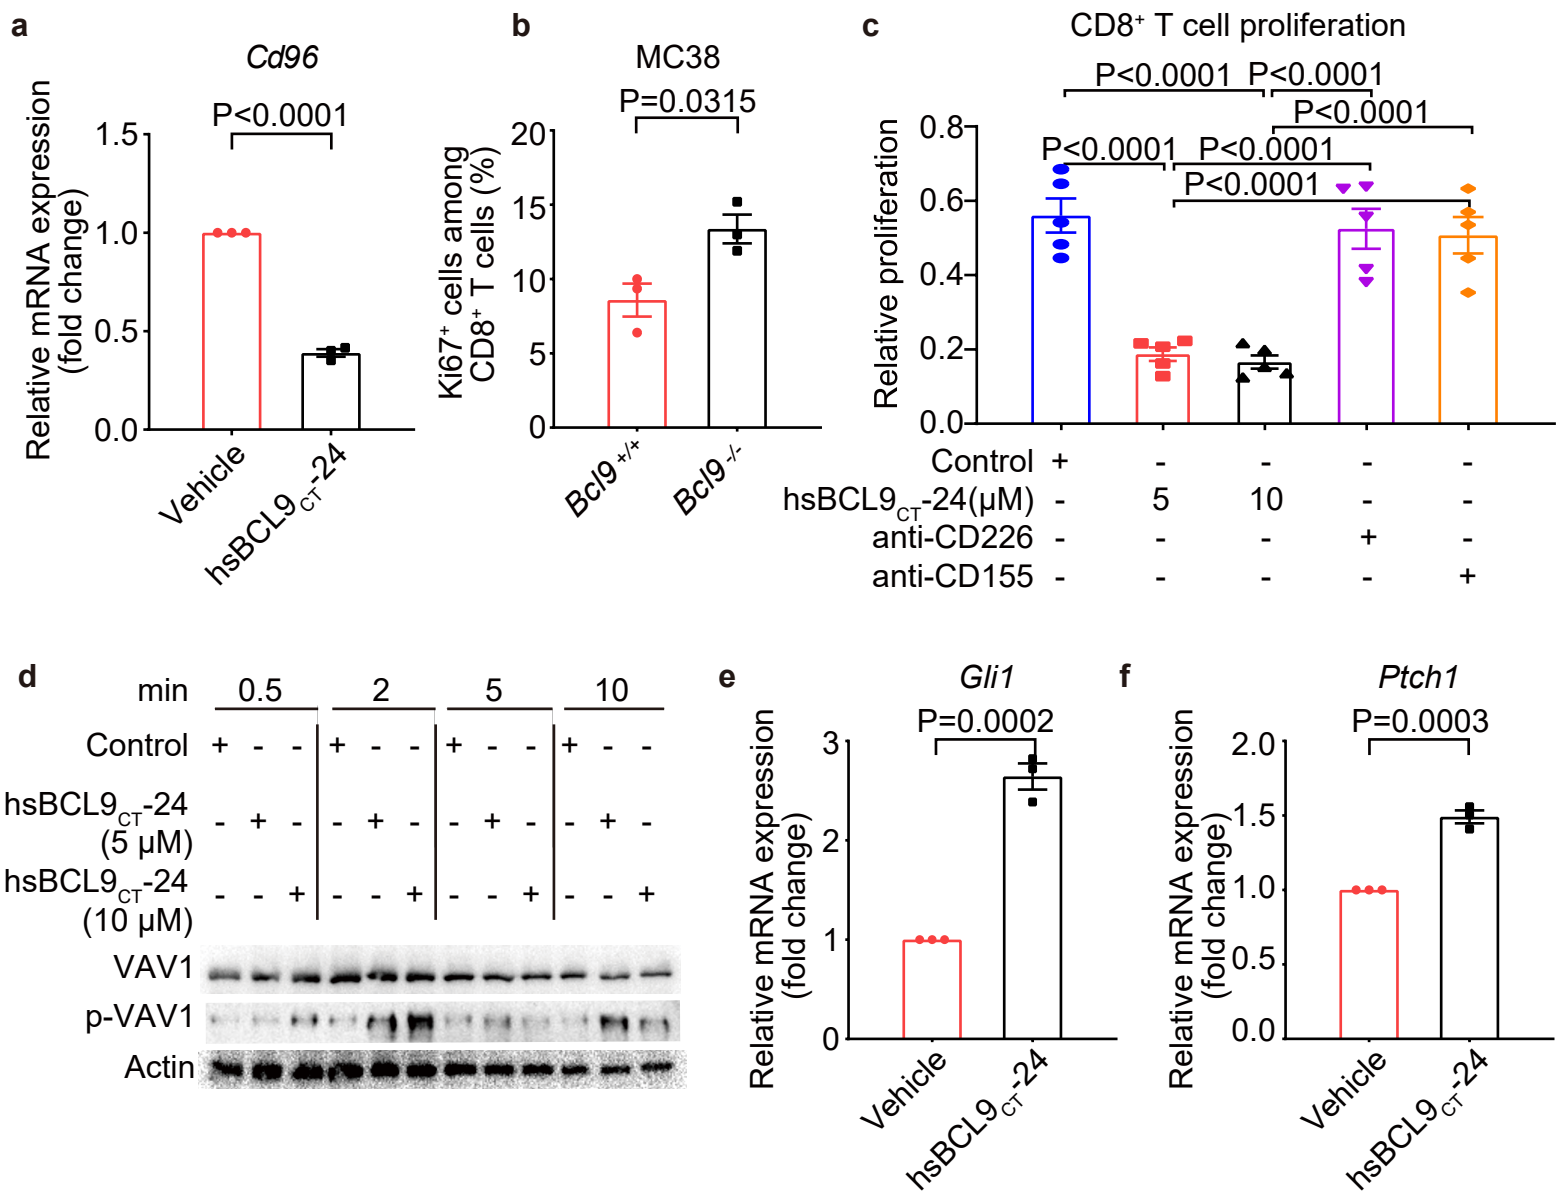

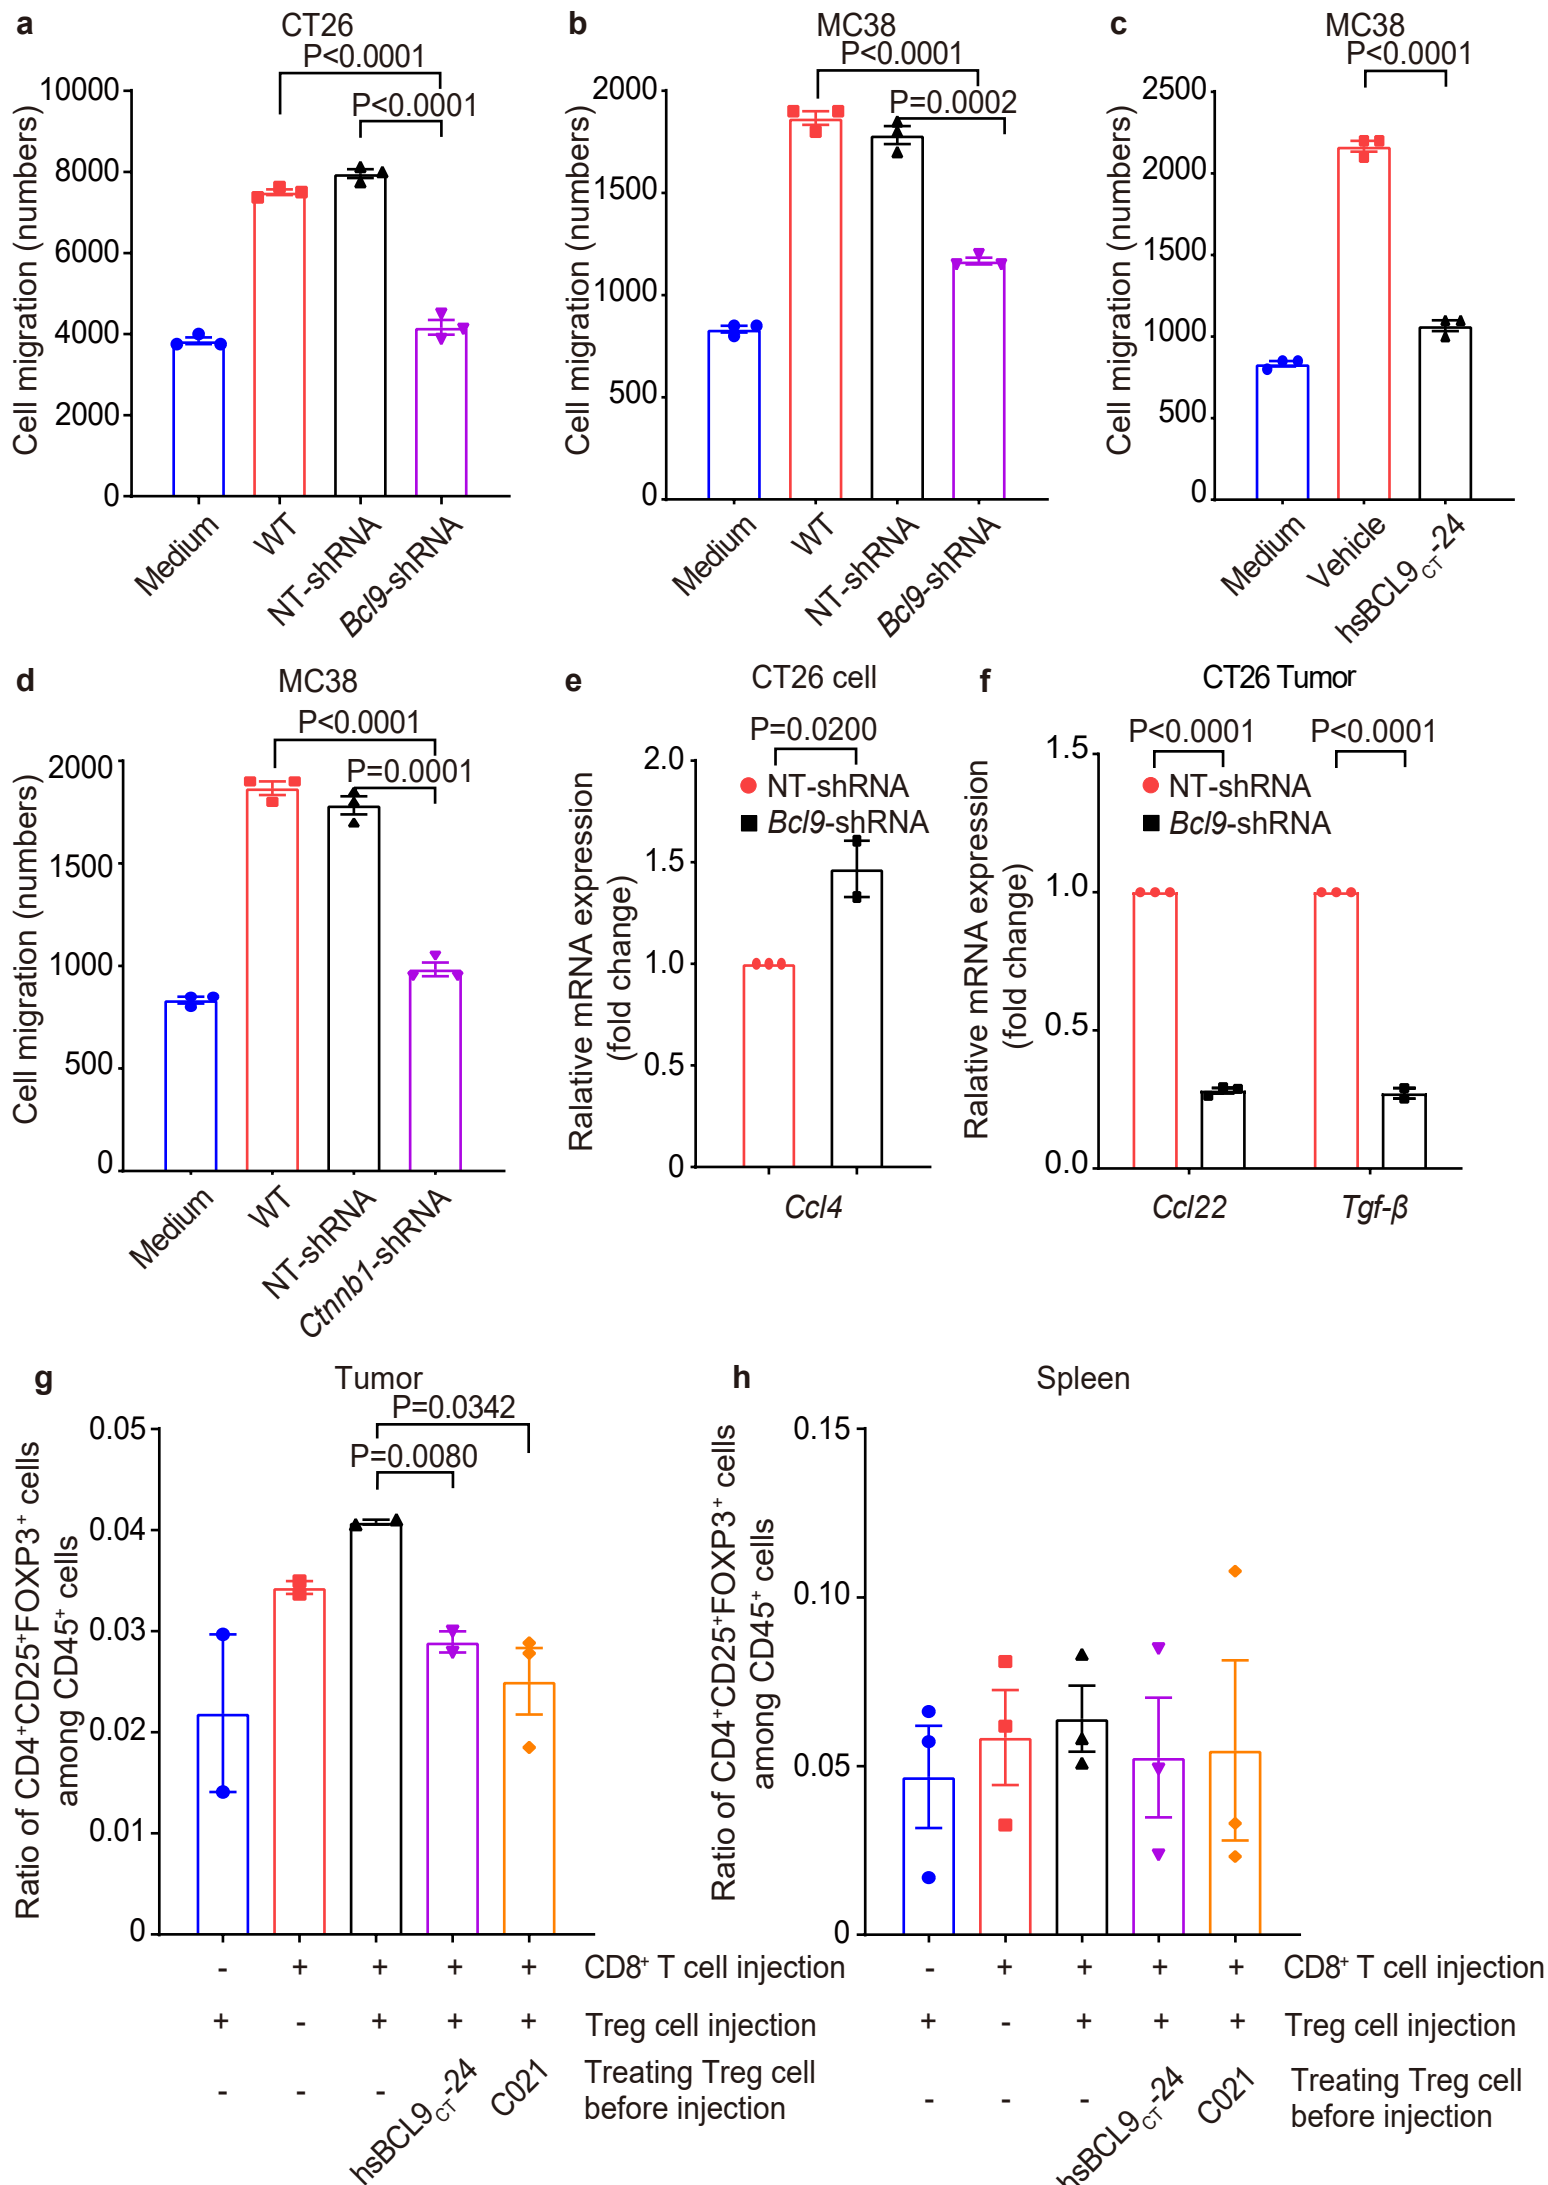

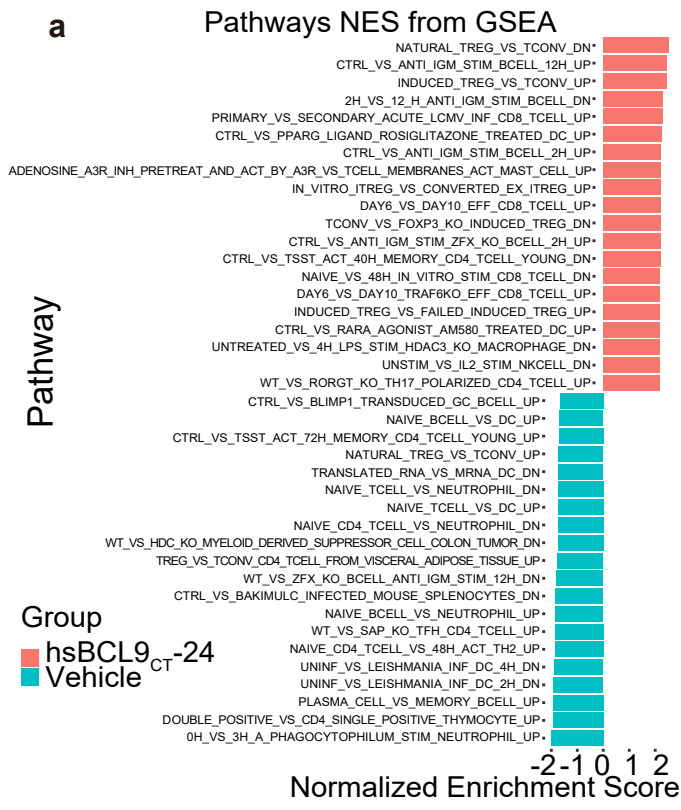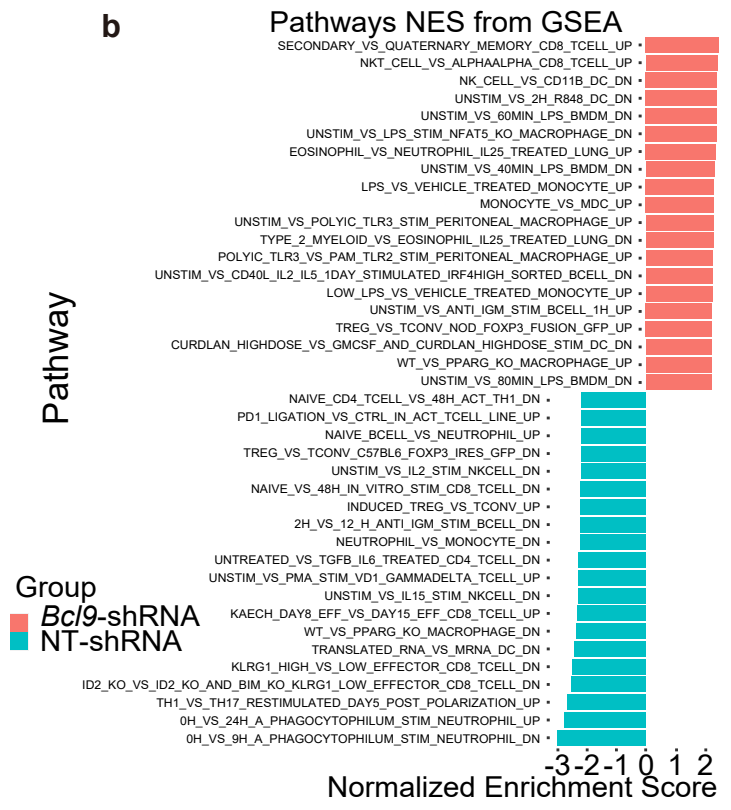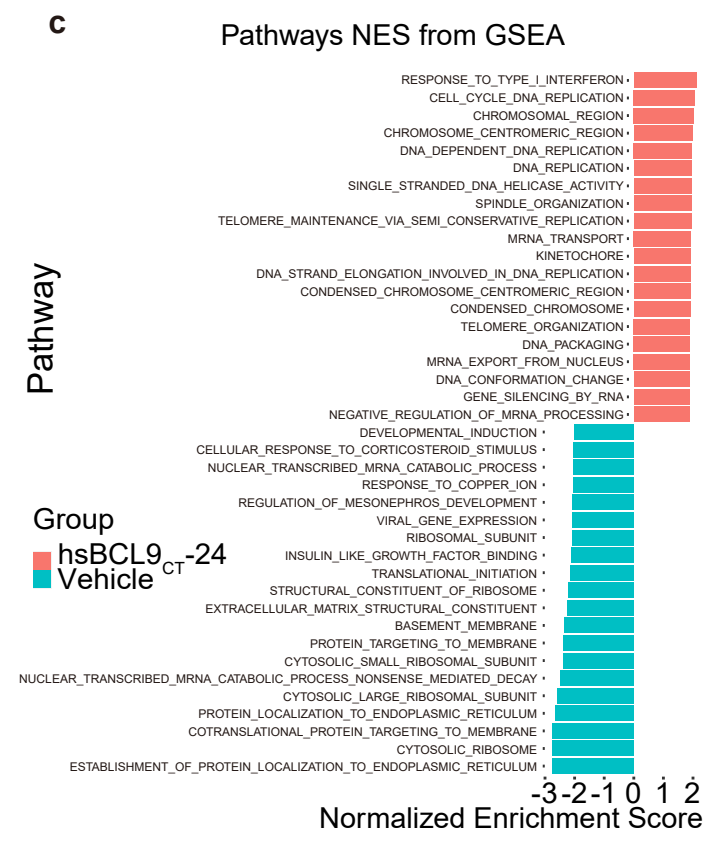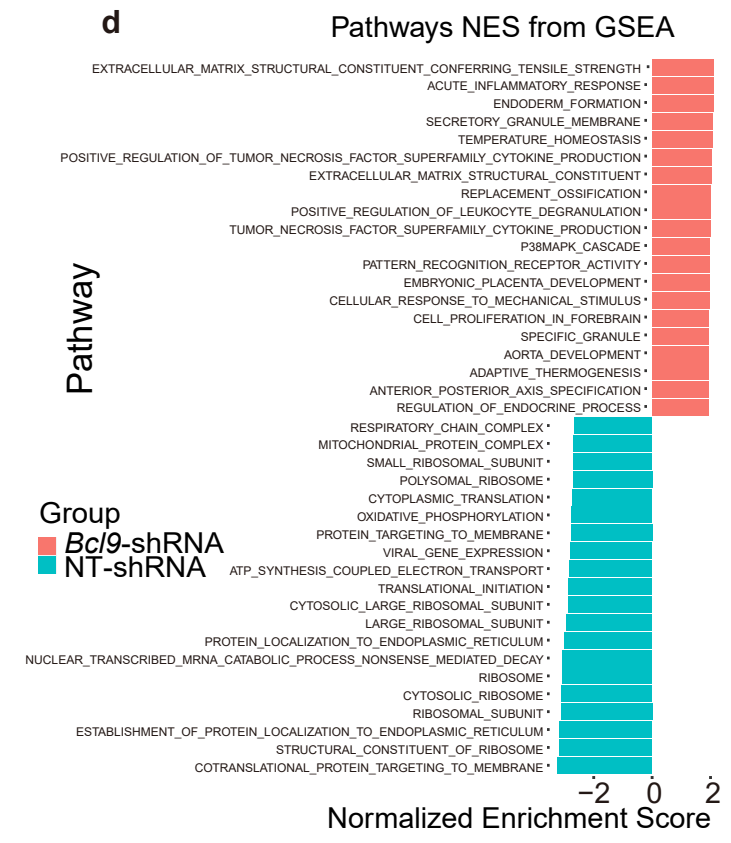



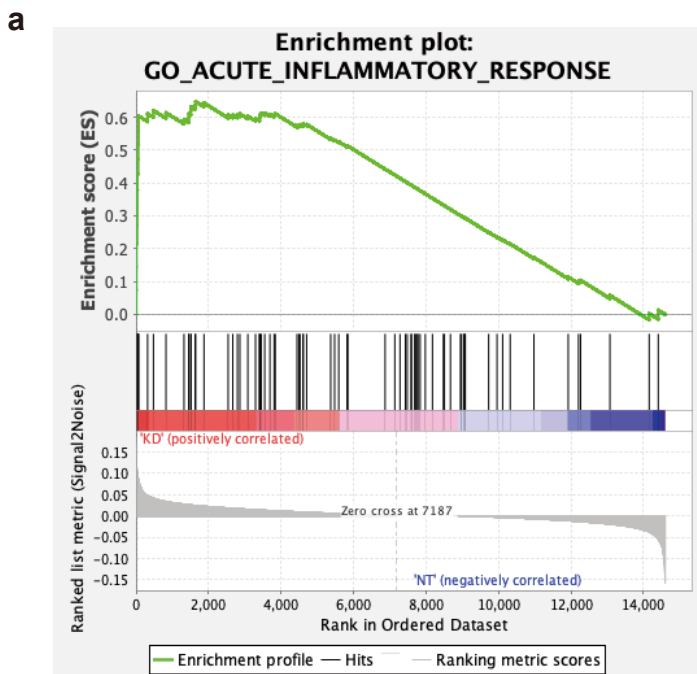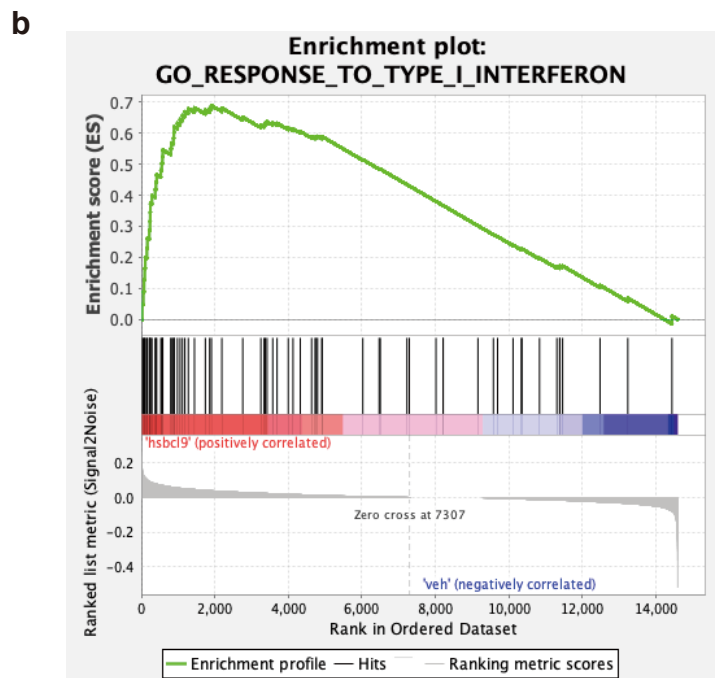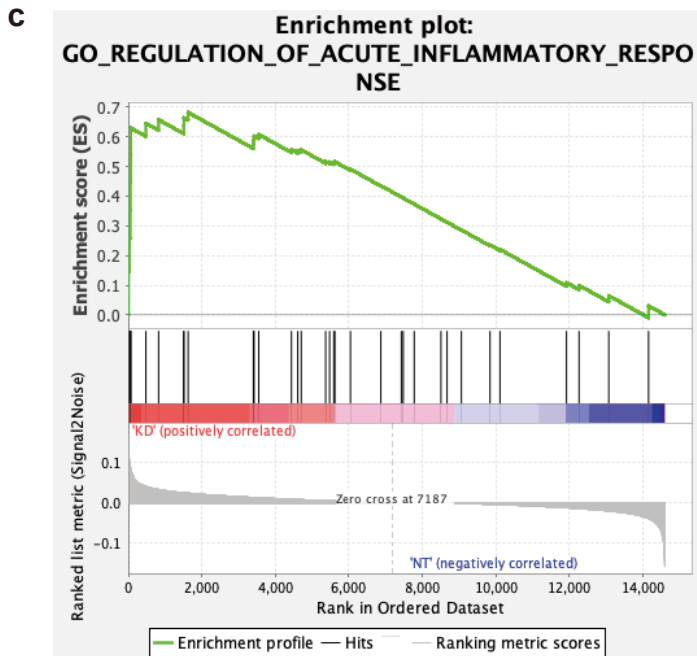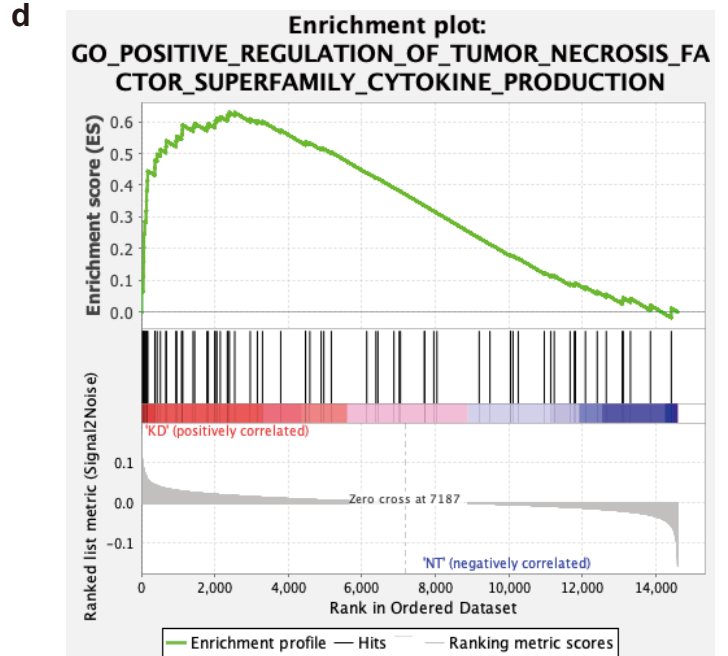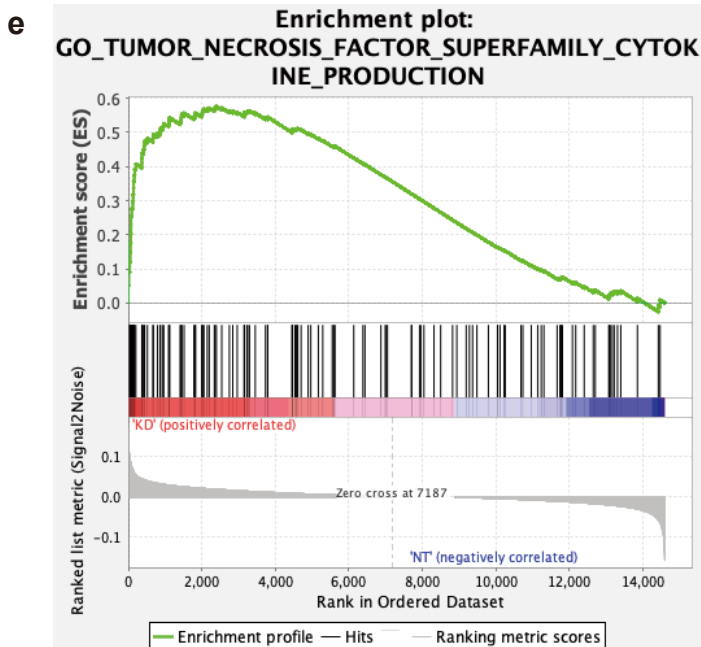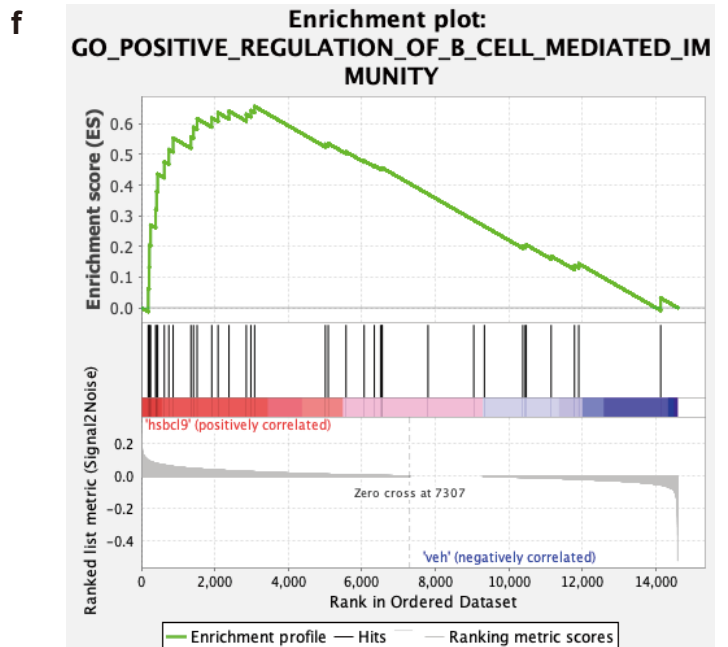

**a**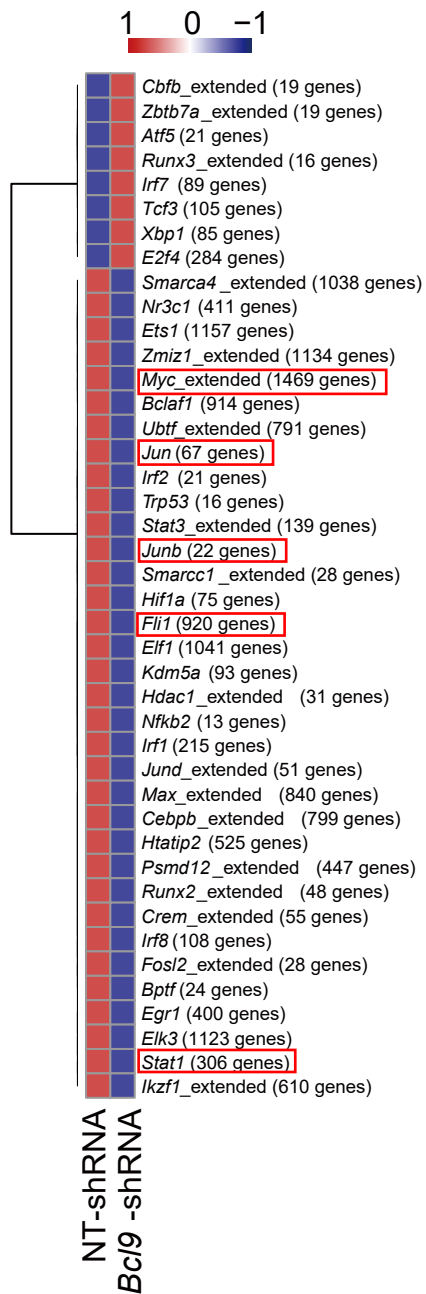**b**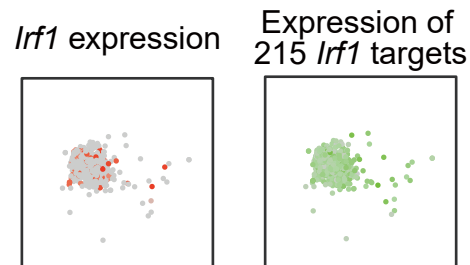**c**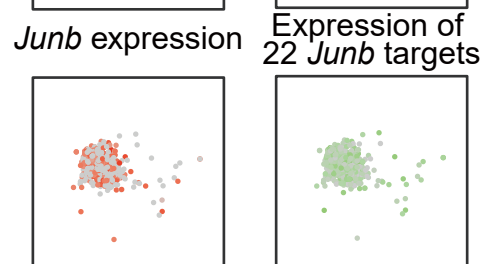**d**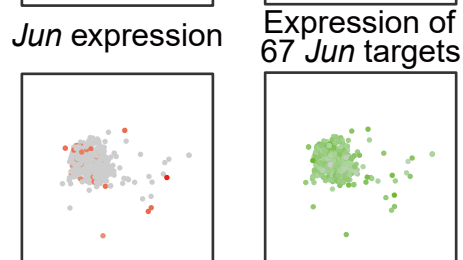**e**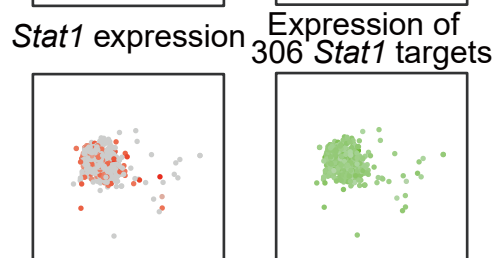**f**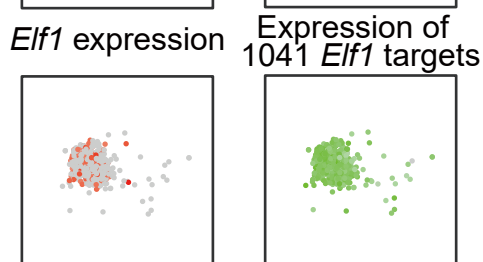

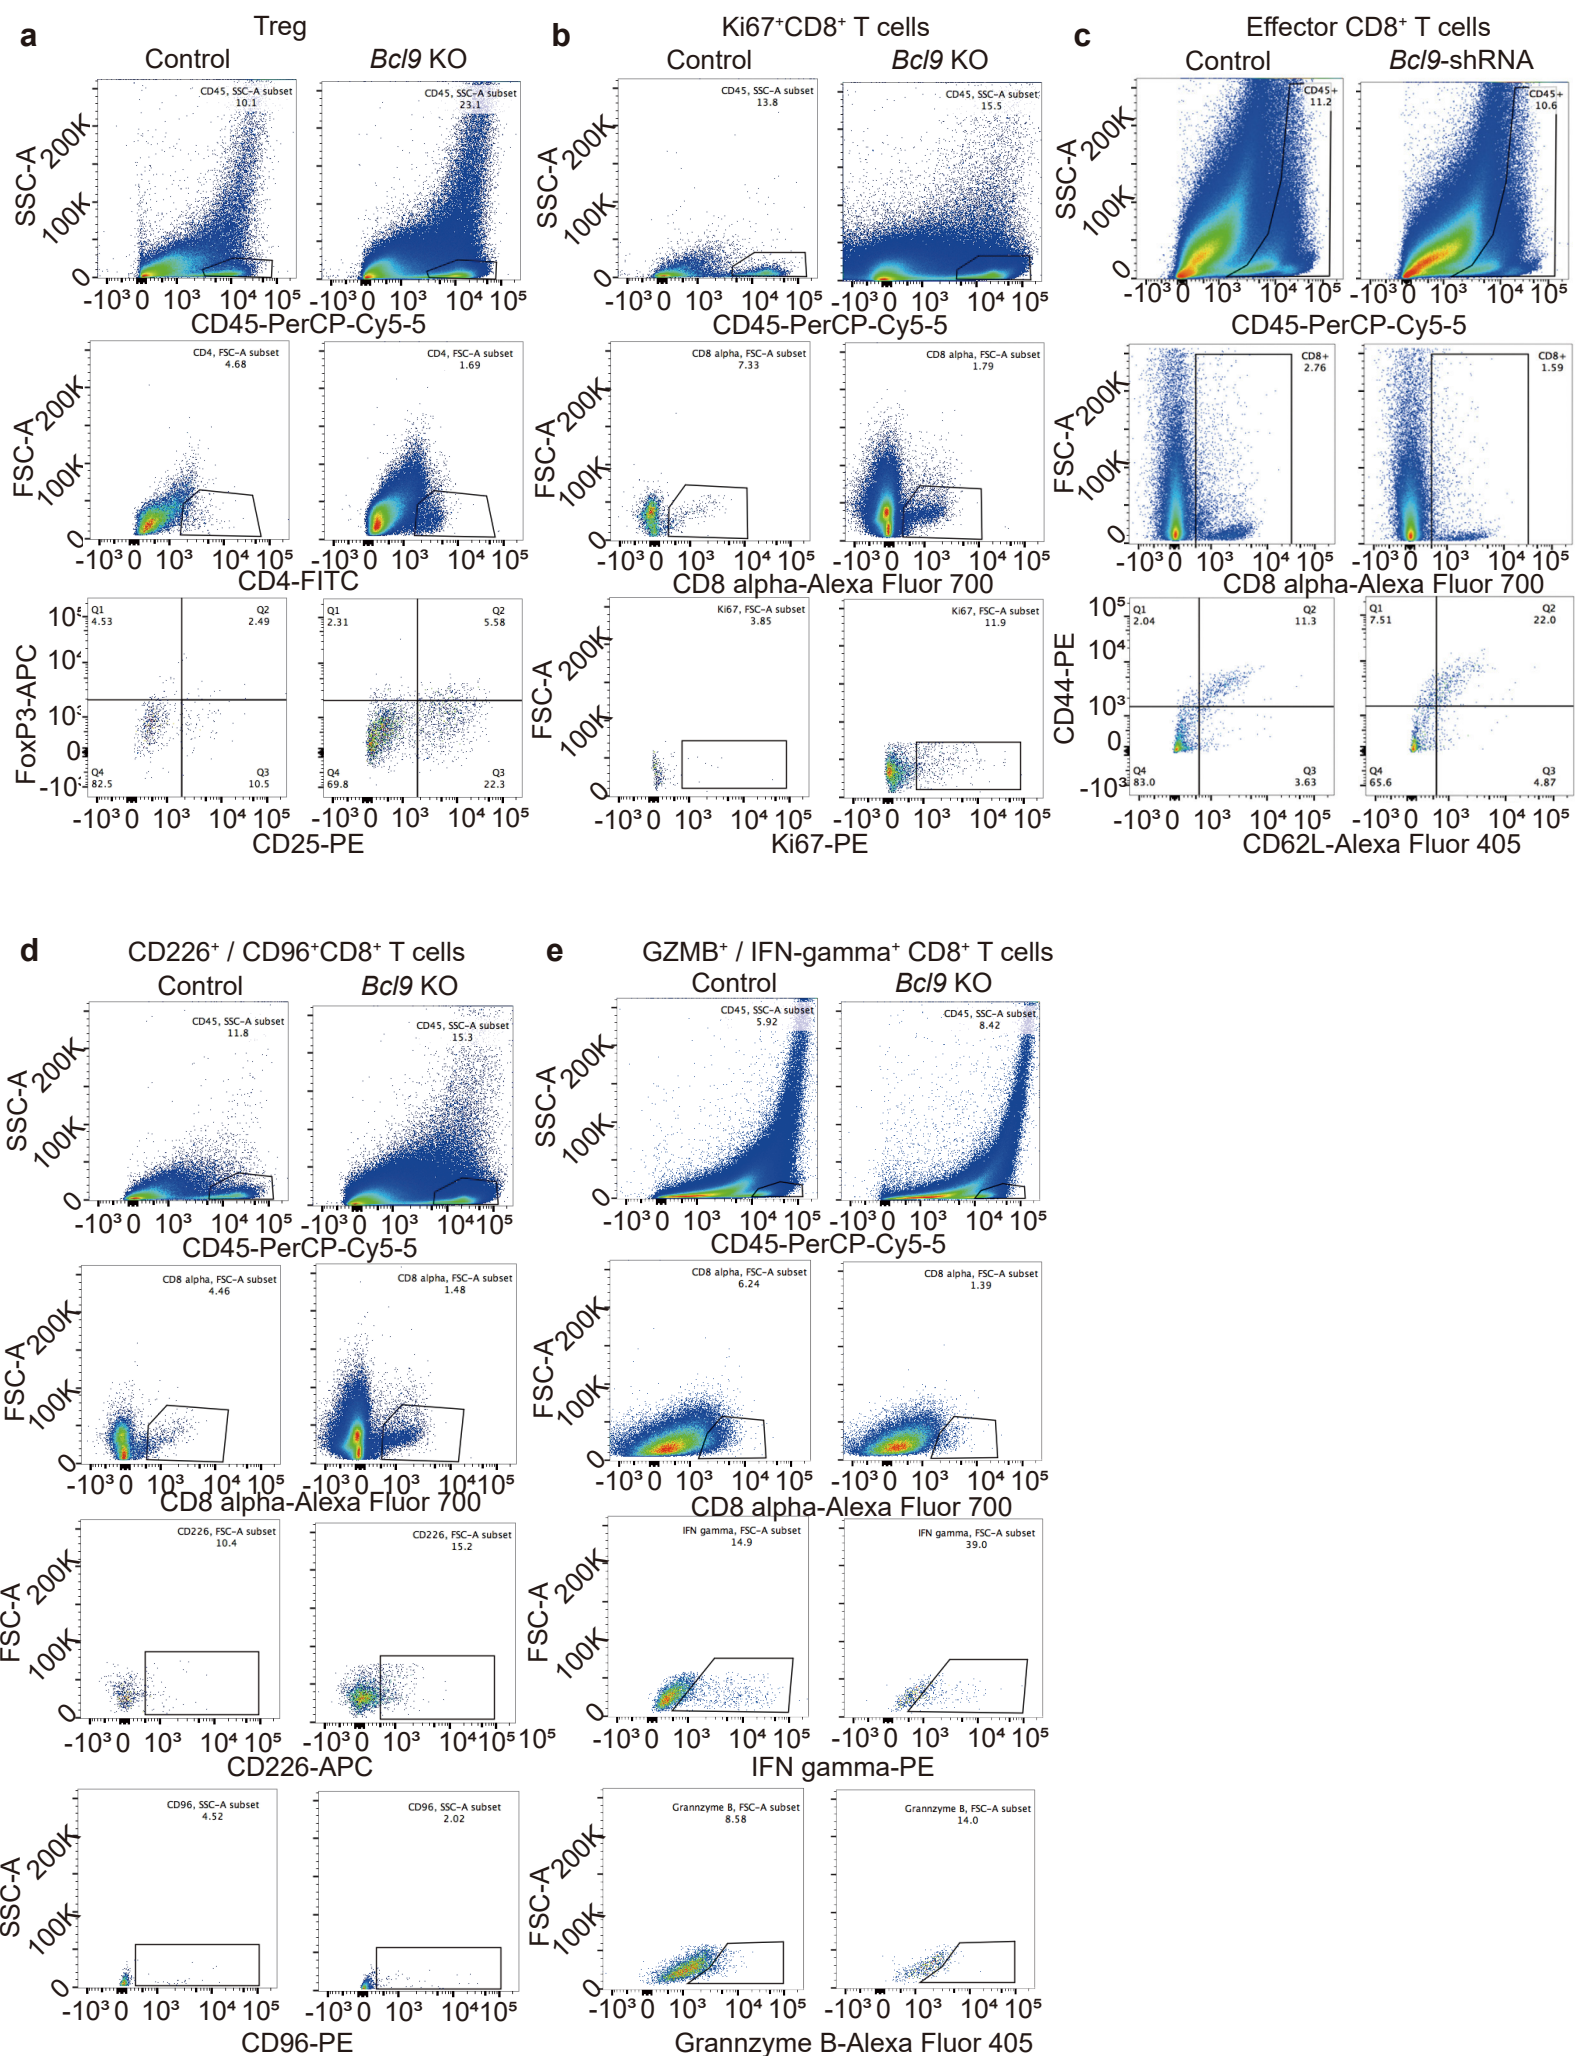

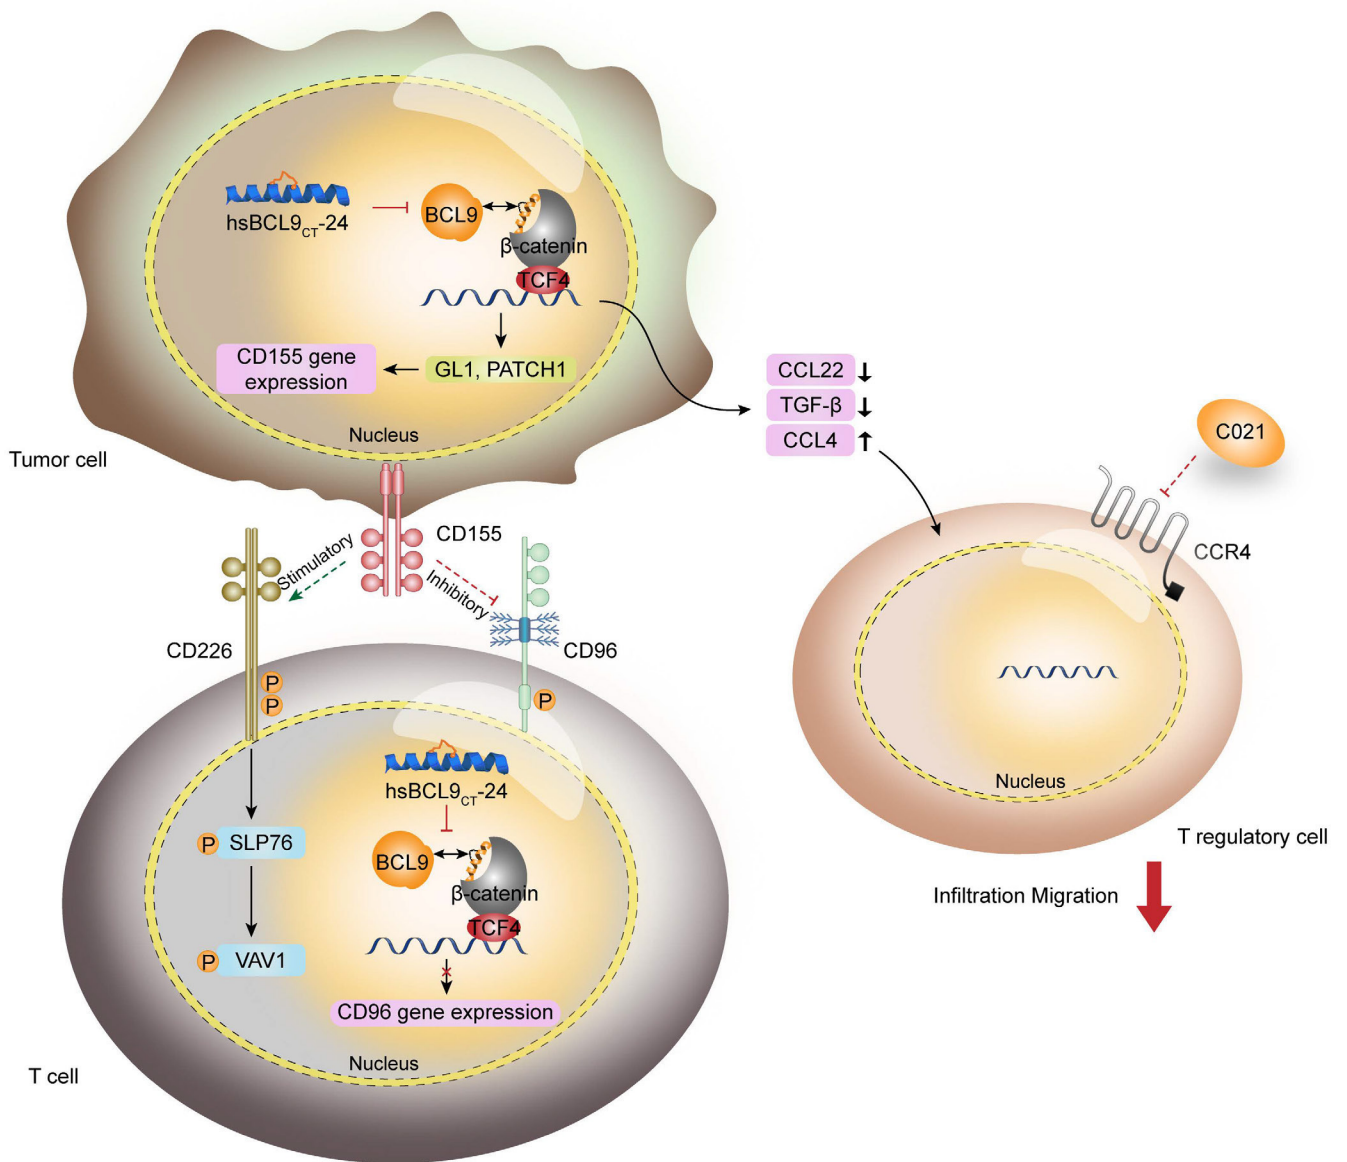

Supplement: 41392_2021_730_MOESM3_ESM.pdf [file 41392_2021_730_MOESM3_ESM.pdf]
